# Supplementary material
Source: publisher figshare collection journal article supplement (https://acs.figshare.com/ndownloader/files/30585062)

## Supporting Information

### Dynorphin neuropeptides decrease apparent proton affinity of ASIC1a by occluding the acidic pocket

Lilia Leisle<sup>1\*</sup>, Michael Margreiter<sup>2,3</sup>, Audrey Ortega-Ramírez<sup>1</sup>, Elinor Cleuvers<sup>1</sup>, Michèle Bachmann<sup>1</sup>, Giulia Rossetti<sup>2,4,5</sup> & Stefan Gründer<sup>1\*</sup>

<sup>1</sup> Institute of Physiology, RWTH Aachen University, 52074 Aachen, Germany

<sup>2</sup> Computational Biomedicine – Institute for Advanced Simulation/Institute of Neuroscience and Medicine, Forschungszentrum Jülich, 52425 Jülich, Germany

<sup>3</sup> RWTH Aachen University, Institute of Organic Chemistry, Landoltweg 1, 52074 Aachen, Germany

<sup>4</sup> Jülich Supercomputing Center (JSC), Forschungszentrum Jülich, 52425 Jülich, Germany

<sup>5</sup> Department of Neurology, RWTH Aachen University, 52074 Aachen, Germany

#### *Corresponding author information*

\* Email: lilia.leisle@gmail.com (L.L.)

\* Email: sgruender@ukaachen.de (S.G.)

#### **Contents**

|                                                                                                   |     |
|---------------------------------------------------------------------------------------------------|-----|
| Figure S1. Molecular dynamics simulation of the Dyn A(1-13)-ASIC1a interaction. .                 | S2  |
| Figure S2. Site-specific incorporation of azF into ASIC1a is efficient. ....                      | S3  |
| Figure S3. Detection of Big Dyn and ASIC1a after photo-crosslinking and immunoprecipitation. .... | S4  |
| Figure S4. Functional analysis of ASIC1a WT and mutants. ....                                     | S5  |
| Figure S5. Conditioning pH determines the extent of ASIC1a modulation by Big Dyn. ....            | S6  |
| Figure S6. Functional properties of ASIC1a with a covalently attached Big Dyn. ....               | S7  |
| Figure S7. Representative patch clamp recordings of D345azF. ....                                 | S8  |
| Figure S8. Representative patch clamp recordings of D237azF. ....                                 | S9  |
| Figure S9. MS spectrum and HPLC chromatogram for Big Dyn. ....                                    | S10 |

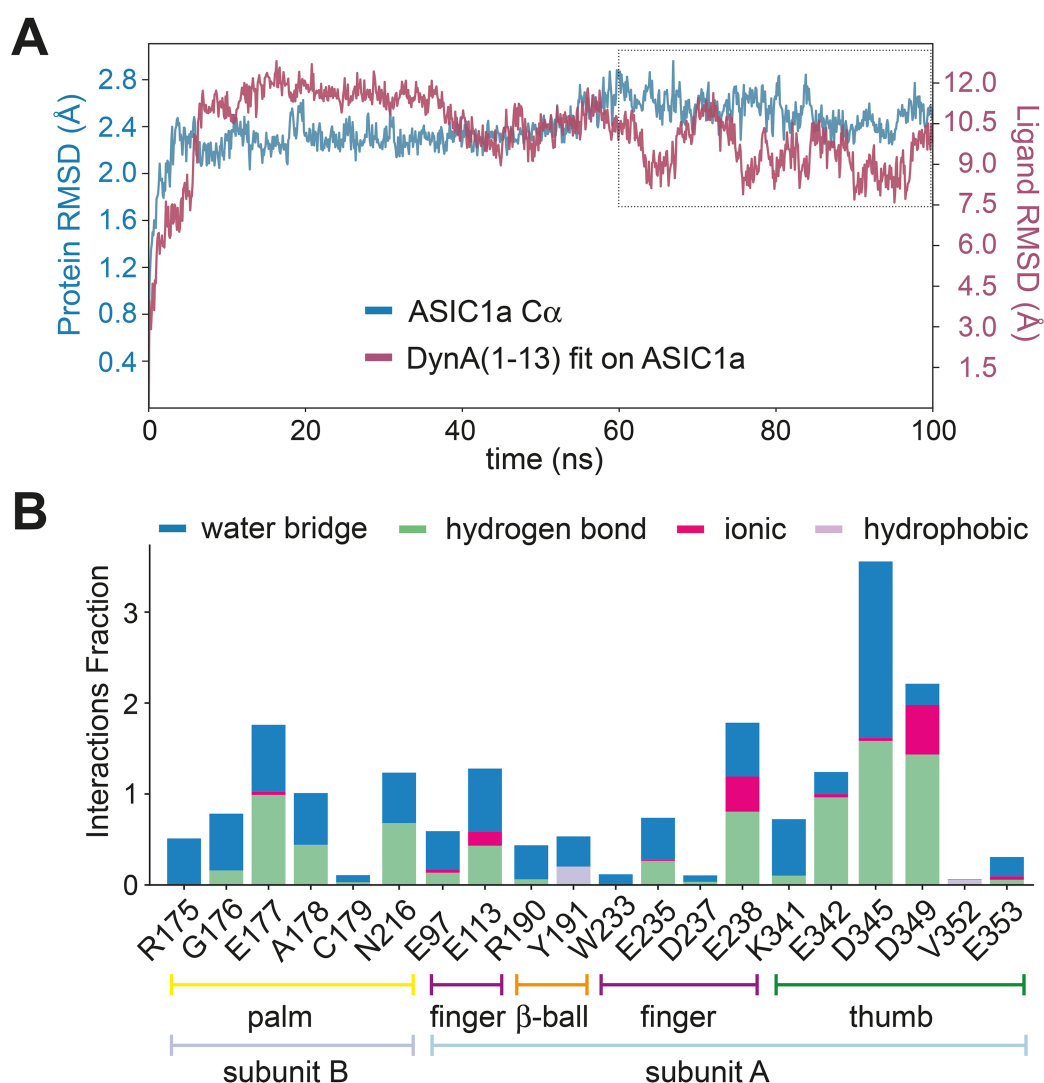

**Figure S1. Molecular dynamics simulation of the Dyn A(1-13)-ASIC1a interaction. (A)** Root mean square deviation (RMSD) of the protein C $\alpha$  atoms and the ligand with respect to the initial structure. **(B)** Histogram showing the number of non-covalent interactions observed over 95% of the simulation time (60-100 ns), color-coded by their particular type. Water bridges, hydrogen bonds and ionic interactions are electrostatic interactions. The stacked bar charts are normalized over the course of the trajectory: for example, a value of 0.5 suggests that 50% of the simulation time the specific interaction is maintained. Values >1.0 are possible as some protein residue may make multiple contacts of the same subtype with the ligand. The domains of two ASIC1a subunits that mediate the interaction are indicated.

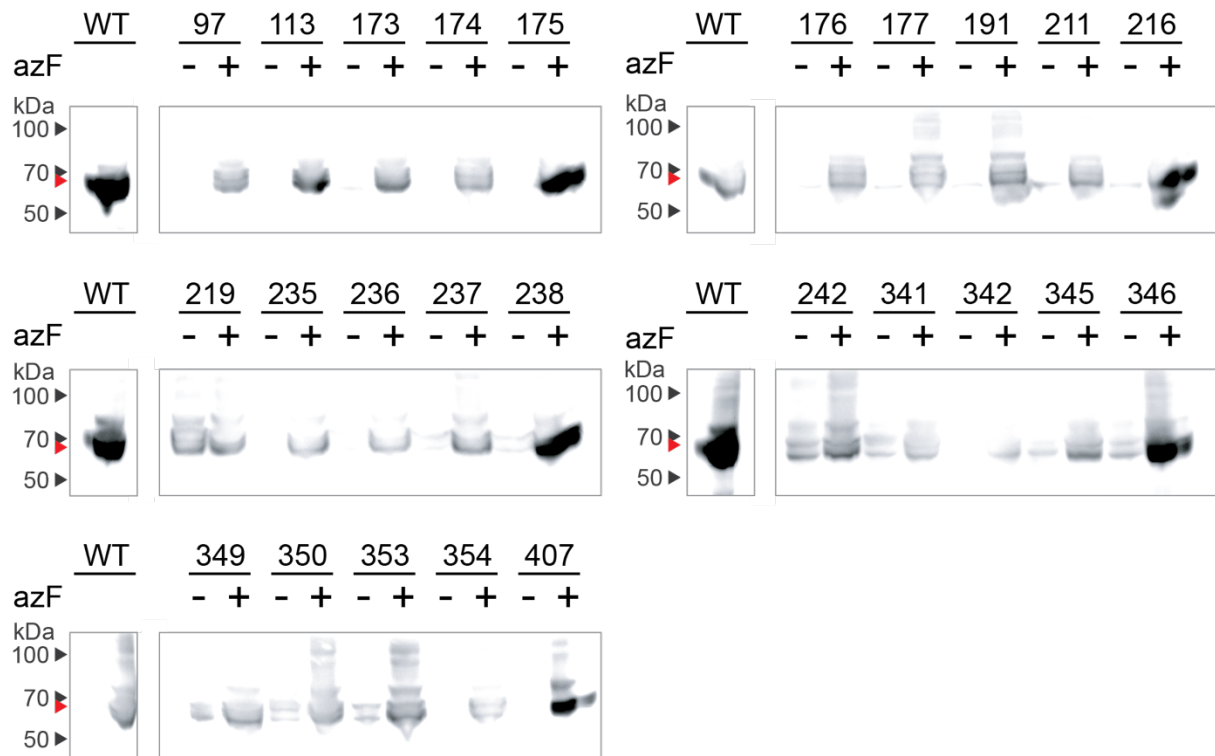

**Figure S2. Site-specific incorporation of azF into ASIC1a is efficient.** All 25 ASIC1a mutants have been expressed in the absence (-) or presence (+) of 0.5 mM azF in the cell media. About 40 h after transfection, cells were lysed directly in Laemmli sample buffer and subjected to a western blot procedure. Expression of ASIC1a constructs was detected with an anti-ASIC1a antibody. *Red arrow heads* point to ASIC1a full-length monomers. At all positions (besides 219) azF was incorporated efficiently (high signal for '+ azF' conditions, no or low signal for '- azF' conditions). At position 219, non-specific incorporation of canonical amino acids was interfering with azF incorporation. These experiments have been performed twice independently.

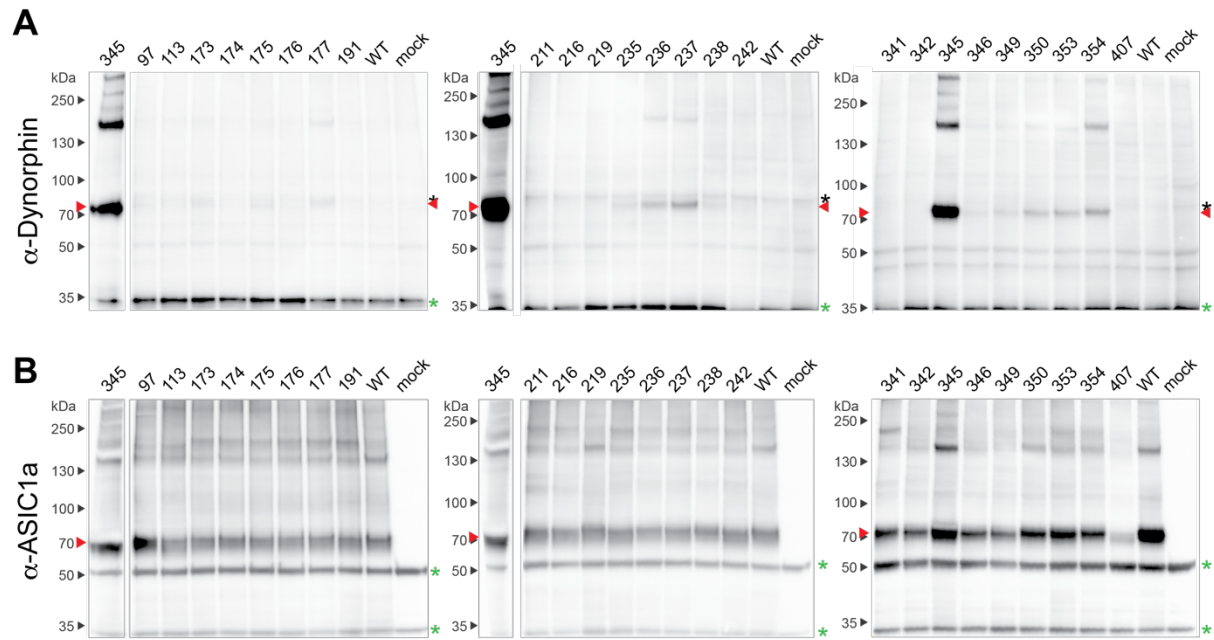

**Figure S3. Detection of Big Dyn and ASIC1a after photo-crosslinking and immunoprecipitation.** The same blots as in Figure 2B are shown here in full size. After detection of Big Dyn (A), the blots have been stripped and developed for ASIC1a (B). *Red arrow heads* point to covalent ASIC1a-Big Dyn complexes (A) and to monomeric ASIC1a (B), respectively. In (A), *black stars* indicate non-specific bands that run close to the specific bands (i.e. covalent ASIC1a-Big Dyn complexes). *Green stars* show the signal that emerged from antibodies used for the immunoprecipitation of ASIC1a. Bands in the upper molecular weight range (>130 kDa) may indicate ASIC1a multimers.

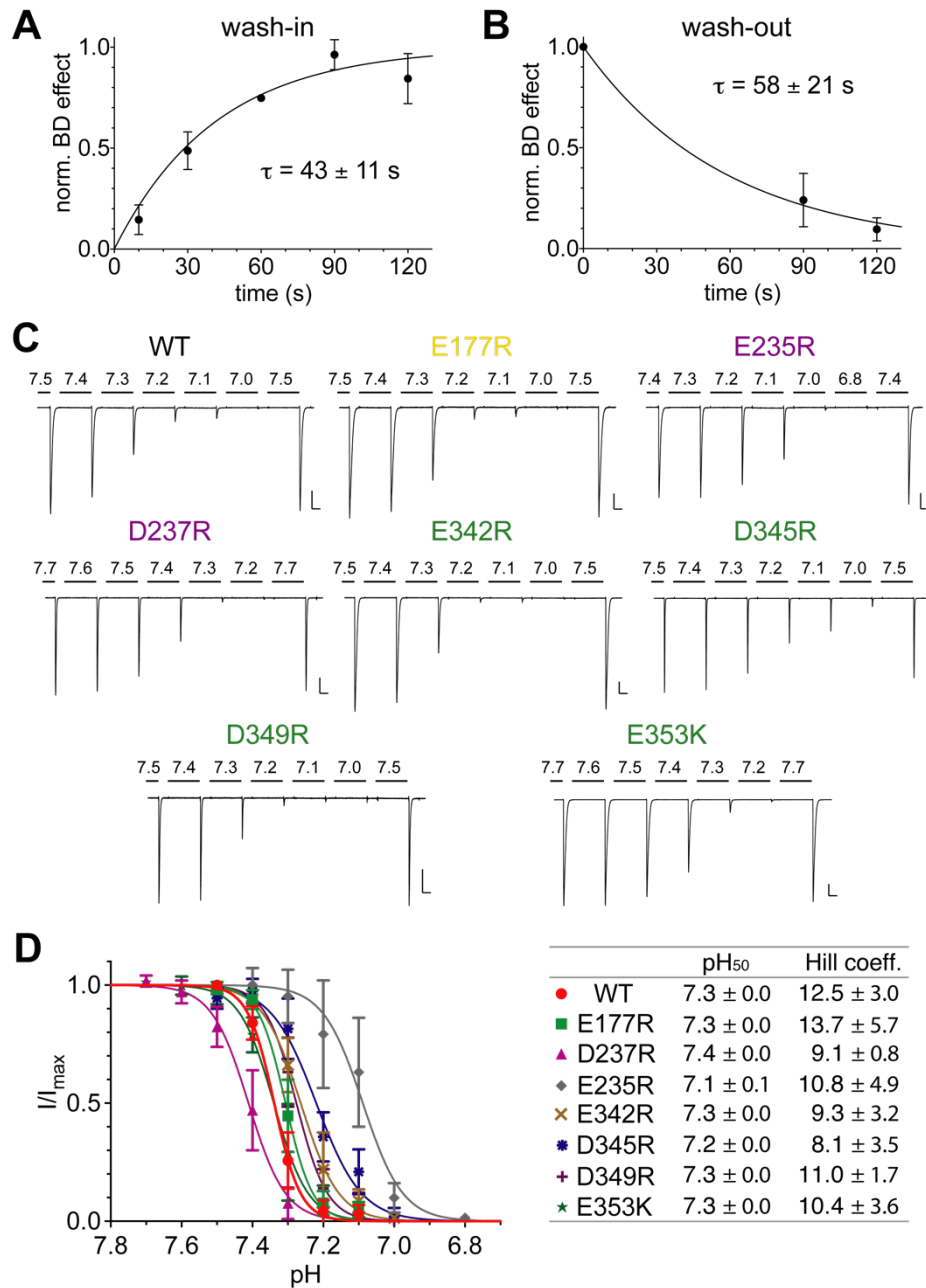

**Figure S4. Functional analysis of ASIC1a WT and mutants.** (A, B) Wash-in (A) and wash-out (B) times for the modulation by Big Dyn (BD). Pre-conditioning pH of 7.15 was used which resulted in a maximal Big Dyn effect of  $42 \pm 4\%$  of  $I_{\max}$  after  $\sim 90$  s of washing in  $2.5 \mu\text{M}$  Big Dyn. For wash-out experiments, Big Dyn was applied for 120 s at pH 7.15 and then washed out for varying times at pH 7.15. Fitting the kinetics yielded a time constant  $\tau = 43 \pm 11$  s for wash-in ( $n = 4$  for each time point) and  $\tau = 58 \pm 11$  s for wash-out ( $n = 3-4$  for each time point). Due to few time points,  $\tau$  for wash-out is only a rough estimate. ASIC1a was activated with pH 6 for 10 s. (C) Representative TEVC recordings for SSD of ASIC1a WT and all mutants. Horizontal scale bars, 20 s; vertical scale bars,  $2 \mu\text{A}$ . (D) SSD curves for ASIC1a WT and mutants are shown on the left, corresponding pH<sub>50</sub> and Hill coefficient values obtained from fits are shown on the right ( $n = 5-8$ ). In (A-B) and (D), data are shown as mean  $\pm$  SD.

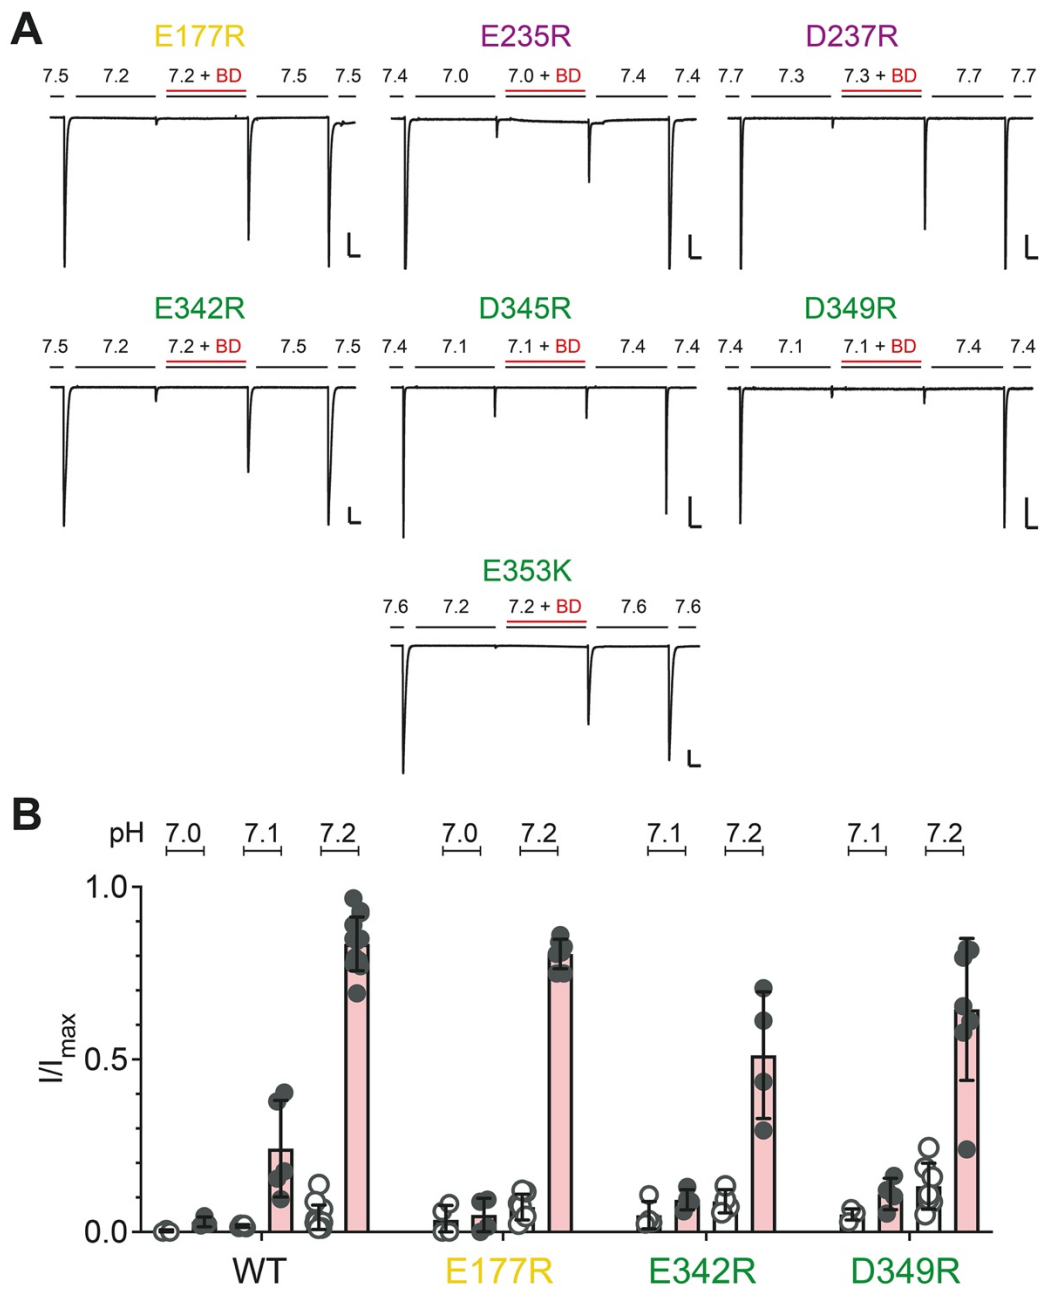

**Figure S5. Conditioning pH determines the extent of ASIC1a modulation by Big Dyn. (A)** Representative TEVC recordings for ASIC1a mutants shown in Figure 3C. *Horizontal scale bars, 20 s; vertical scale bars, 2  $\mu$ A.* **(B)** For three mutants and the WT, the Big Dyn (BD) effect was determined at different pre-conditioning pH solutions. Small reductions in pre-conditioning pH, e.g. from 7.2 to 7.1, had only marginal effects on desensitized current amplitudes but drastically decreased the Big Dyn effect. Shown are relative current amplitudes elicited after pre-conditioning in the absence (*empty circles, white bars*) and presence of 2.5  $\mu$ M Big Dyn (*filled circles, red bars*). Bar graphs are dot plots with mean  $\pm$  SD;  $n = 3$ -13 per condition.

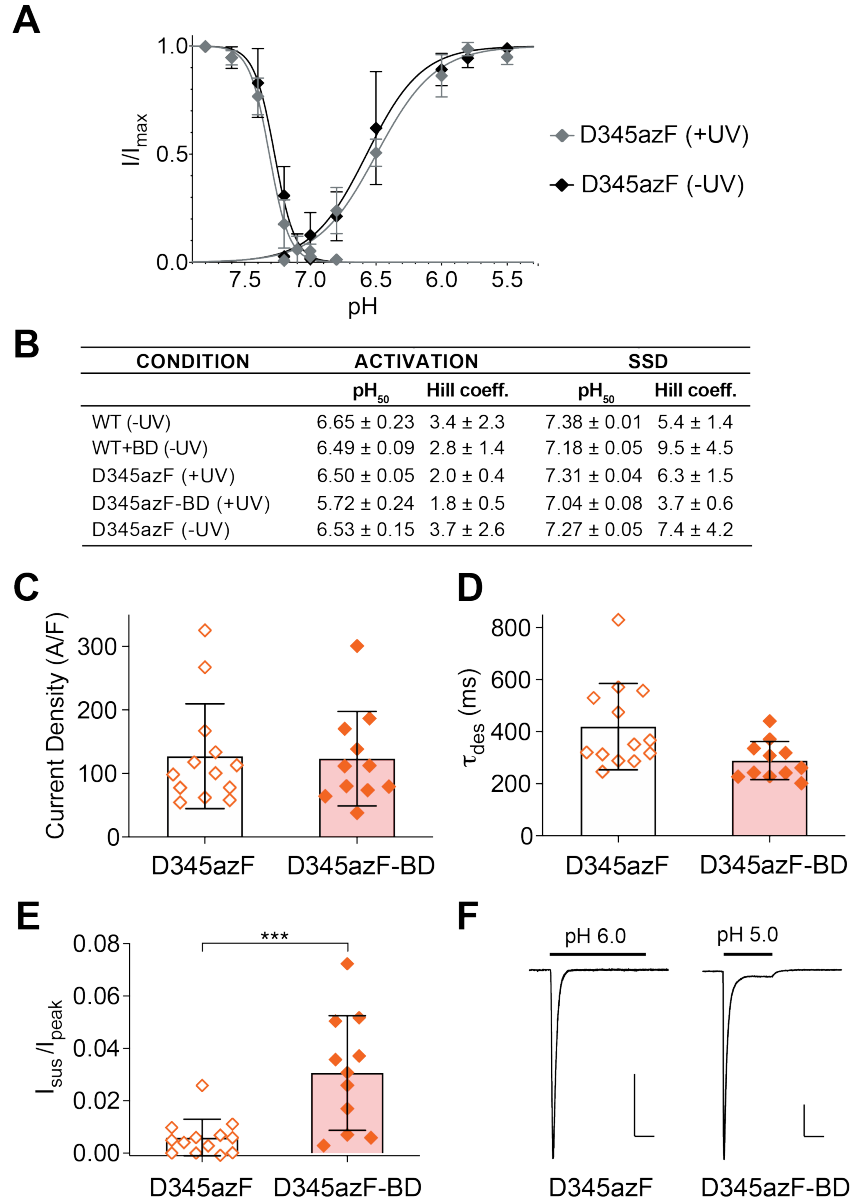

**Figure S6. Functional properties of ASIC1a with a covalently attached Big Dyn.** **(A)** For D345azF, UV treatment (without Big Dyn) had no effect on pH dependence of activation or SSD. Grey, with UV pre-treatment ( $n = 5$ ); black, without UV pre-treatment ( $n = 5$ ). **(B)** Values (mean  $\pm$  SD) from the fits shown in Figure 4C, D and (A). **(C, D)** At maximal activation (pH 6.0 for D345azF, pH 5.0 for D345azF-BD), neither the current density (C) nor the desensitization kinetics (D) were altered by the covalent link to Big Dyn.  $n(\text{D345azF}) = 13$ ,  $n(\text{D345azF-BD}) = 11$ . **(E)** A small sustained current component ( $I_{\text{sus}}$ ) was observed for D345azF-BD when maximally activating the channels (pH 6.0 for D345azF, pH 5.0 for D345azF-BD).  $n(\text{D345azF}) = 13$ ,  $n(\text{D345azF-BD}) = 11$ ;  $p = 0.0009$ . Bars represent mean  $\pm$  SD. **(F)** Representative traces for recordings from which the data shown in (C-E) have been obtained. Horizontal scale bars, 2 s; vertical scale bars, 1 nA.

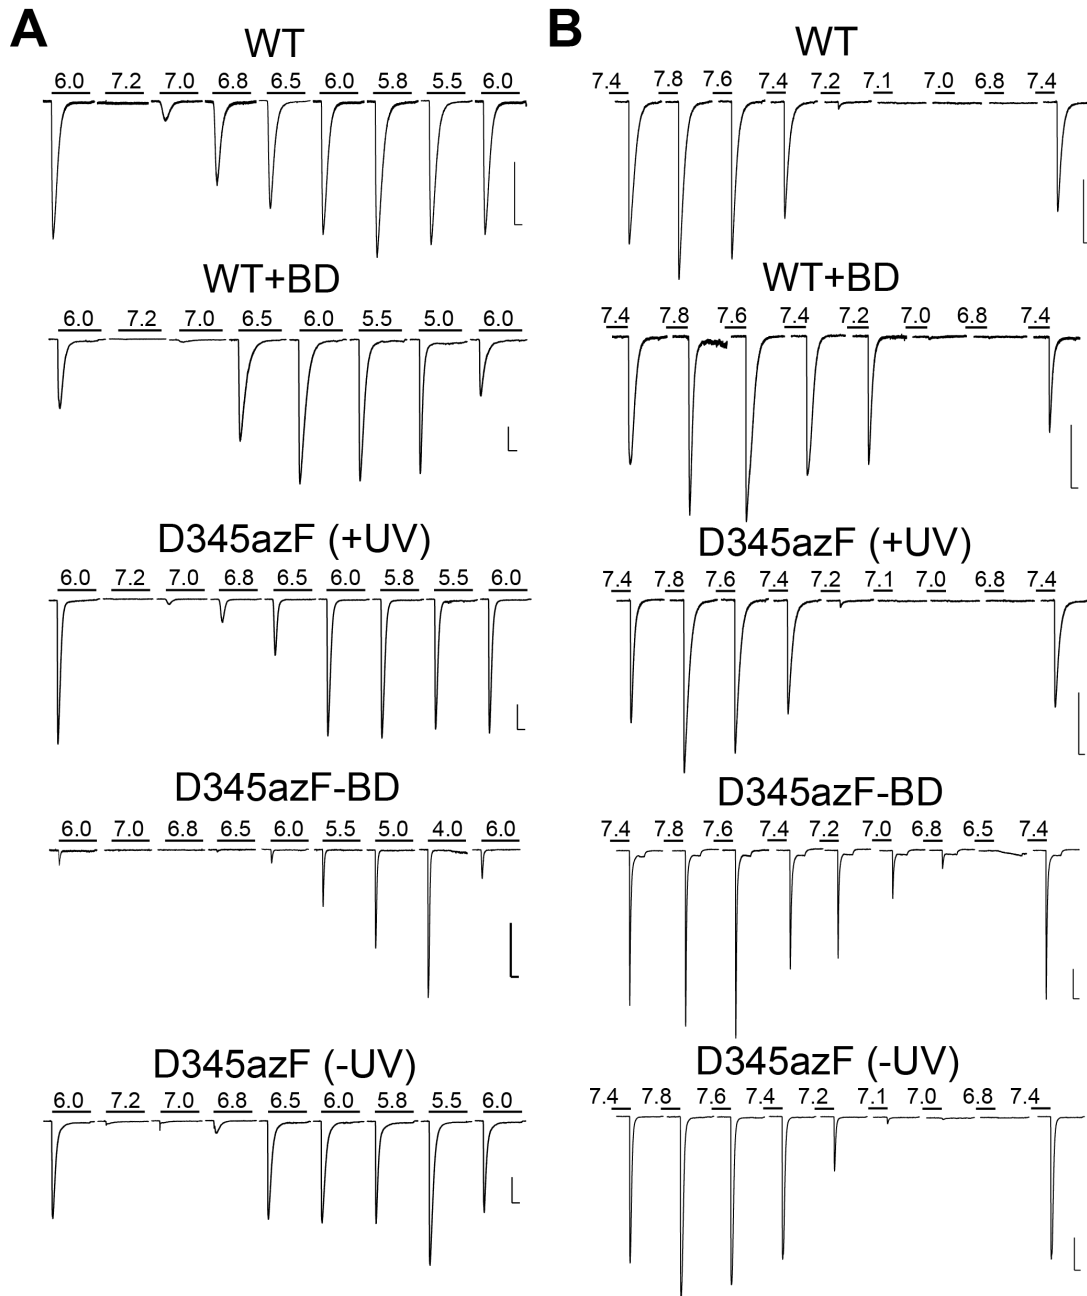

**Figure S7. Representative patch clamp recordings of D345azF. (A)** pH dependence of activation for all conditions presented in Figure 4C and Supporting Figure S6. pH values used for activation are indicated; pre-conditioning pH was 7.4. **(B)** pH dependence of SSD for all conditions presented in Figure 4C and Supporting Figure S6. Pre-conditioning pH values are indicated; activation was performed with pH 5.0 for D345azF-BD and with pH 6.0 for all other conditions. For the recordings of WT+BD and D345azF (+UV) shown here, the pre-conditioning pH solutions were applied in random order; the rest of the experiments has been performed in the order as illustrated. *Horizontal scale bars, 2 s; vertical scale bars, 1 nA.*



**A**

| CONDITION        | ACTIVATION       |             | SSD              |             |
|------------------|------------------|-------------|------------------|-------------|
|                  | pH <sub>50</sub> | Hill coeff. | pH <sub>50</sub> | Hill coeff. |
| D237azF (+UV)    | 6.43 ± 0.2       | 2.0 ± 0.1   | 7.34 ± 0.1       | 5.9 ± 0.6   |
| D237azF-BD (+UV) | 5.8 ± 0.08       | 1.3 ± 0.8   | 7.1 ± 0.01       | 4.5 ± 0.5   |
| D237azF (-UV)    | 6.76 ± 0.01      | 2.5 ± 0.1   | 7.38 ± 0.02      | 6.8 ± 0.7   |

**B****D237azF (-UV)**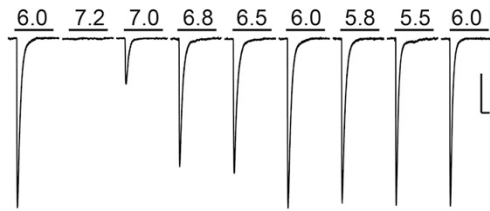**D237azF (+UV)**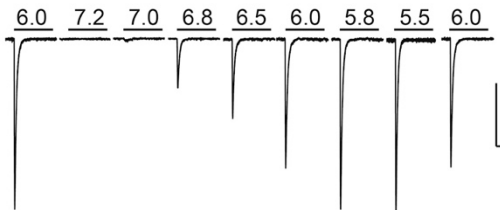**D237azF-BD**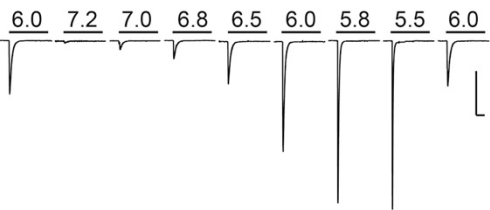**C****D237azF (-UV)**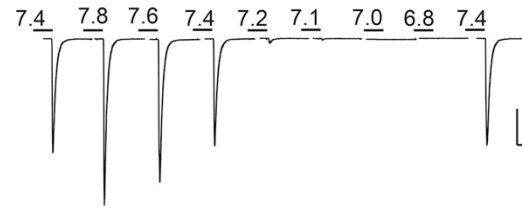**D237azF (+UV)**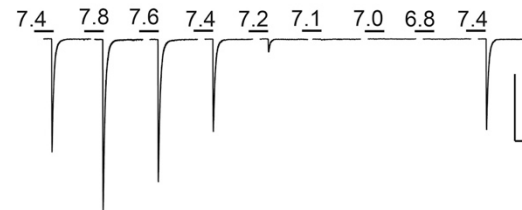**D237azF-BD**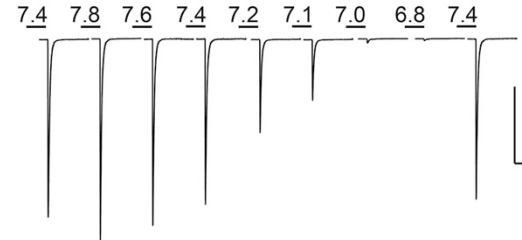

**Figure S8. Representative patch clamp recordings of D237azF. (A)** Values (mean ± SD) from the fits shown in Figure 5C. **(B)** pH dependence of activation for the three conditions presented in Figure 5C. pH values used for activation are indicated; pre-conditioning pH was 7.4. **(C)** pH dependence of SSD for the three conditions presented in Figure 5C. Pre-conditioning pH values are indicated; activation was performed with pH 5.0 for D237azF-BD and with pH 6.0 for the two other conditions. For all the recordings, the pre-conditioning pH solutions were applied in the order as illustrated. *Horizontal scale bars, 2 s; vertical scale bars, 1 nA.*

|                                     |                                         |
|-------------------------------------|-----------------------------------------|
| PEPTIDE:                            | YT-32                                   |
|                                     | Sequence: YGQFLRRIRPKLWQKRYGGFLRRQPKVVT |
|                                     | MW: 3984.66g/mol(MS)                    |
|                                     | Purity: 95.32% HPLC                     |
|                                     | GrossWeight: 10.0mg                     |
| QUALITY CONTROL:                    | Lot n°: P191125-CQ106478                |
|                                     | Reconstitution advice: ACN:H2O=1:9      |
| MS and HPLC: see attached documents |                                         |

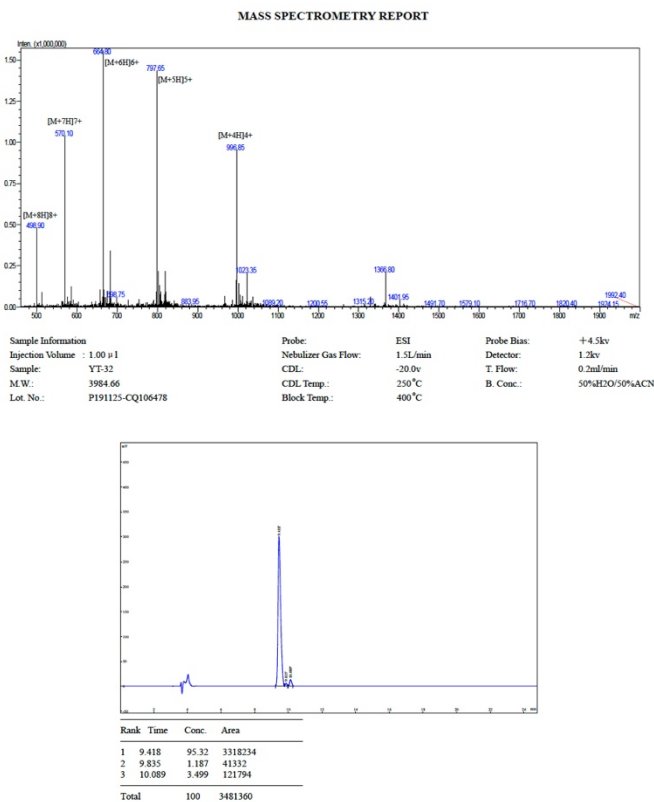

Supplement: Supplementary file 1 [file 30585062]
